# Supplementary material
Source: PubMed Central journal article supplement (PMC3839744)
Supplement: 1311028110_pnas.201311028SI.pdf [file 1311028110_pnas.201311028SI.pdf]

# Supporting Information

Supporting Information Corrected December 30, 2013

Zhang et al. 10.1073/pnas.1311028110

## SI Methods

**Fitting of Equation of States.** The bulk modulus ( $B_0$ ; GPa) and the equivalent volume of the carbon allotropes are obtained by least-square fitting of the equation of states (EOS). Three universal forms of EOS, namely, Vinet EOS (1), Murnaghan EOS (2), and the third-order Birch-Murnaghan EOS (3), are independently used for the fitting, all of which yield consistent results.

### Vinet EOS.

$$P(V) = 3B_0x^{-2}(1-x)\exp[\eta(1-x)], \quad x = \left(\frac{V}{V_0}\right)^{1/3}, \quad \eta = \frac{3}{2}(B'_0 - 1).$$

### Murnaghan EOS.

$$P(V) = \frac{B_0}{B'_0} \left[ \left(\frac{V_0}{V}\right)^{B'_0} - 1 \right].$$

### Third-Order Birch-Murnaghan EOS.

$$P(V) = \frac{3B_0}{2} (x^{-7} - x^{-5}) \left[ 1 + \frac{3}{4}(B'_0 - 4)(x^{-2} - 1) \right], \quad x = \left(\frac{V}{V_0}\right)^{1/3}.$$

Here  $P$  and  $V$  denote the pressure and the corresponding volume of cell, respectively.  $V_0$  is the equivalent volume at zero pressure and  $B'_0$  is the bulk modulus pressure derivative. Integrating these two EOSs with  $V$  yields the corresponding  $E$ - $V$  relationship, where  $E$  is the total energy at volume  $V$ .

### Vinet EOS.

$$E(V) = E_0 + \frac{9B_0V_0}{\eta^2} \left\{ 1 - [1 - \eta(1-x)]\exp[\eta(1-x)] \right\}.$$

### Murnaghan EOS.

$$E(V) = E(0) + \frac{B_0V}{B'_0} \left[ \frac{(V_0/V)^{B'_0}}{B'_0 - 1} + 1 \right] - \frac{B_0V_0}{B'_0 - 1}.$$

### Third-Order Birch-Murnaghan EOS.

$$E(V) = E_0 + \frac{9B_0V_0}{16} \left[ (x^{-2} - 1)^3 B'_0 + (x^{-2} - 1)^2 (6 - 4x^{-2}) \right],$$
$$x = \left(\frac{V}{V_0}\right)^{1/3}.$$

1. Vinet P, Rose JH, Ferrante J, Smith JR (1989) Universal features of the equation of state of solids. *J Phys Condens Matter* 1(11):1941.
2. Murnaghan FD (1944) The compressibility of media under extreme pressures. *Proc Natl Acad Sci USA* 30(9):244-247.

3. Birch F (1947) Finite elastic strain of cubic crystals. *Phys Rev* 71(11):809-824.

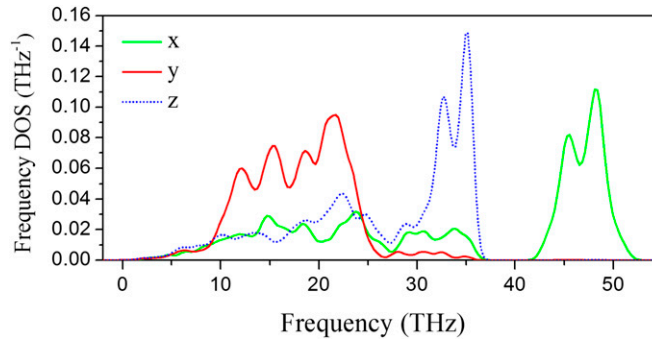

**Fig. S1.** Direction-resolved phonon frequency density of states for C2 atoms in T6-carbon. The x direction here is parallel to the C=C double bond in the structure.

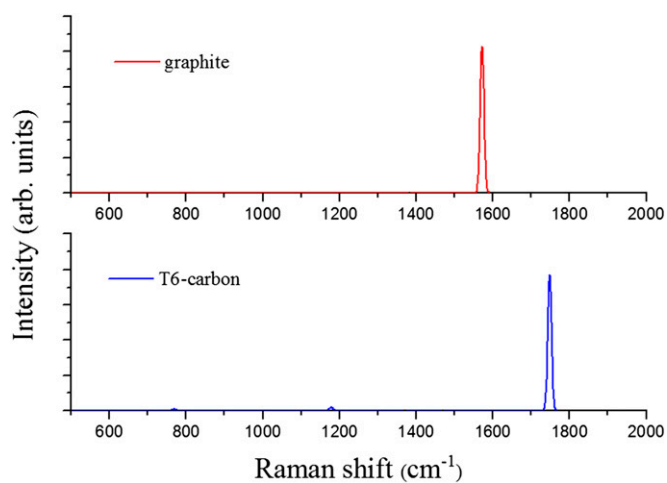

Fig. 52. Calculated first-order Raman spectra of graphite and T6-carbon. Our result in graphite is in good agreement with previous work (1).

1. Tuinstra F, Koenig JL (1970) Raman spectrum of graphite. *J Chem Phys* 53(3):1126–1130.

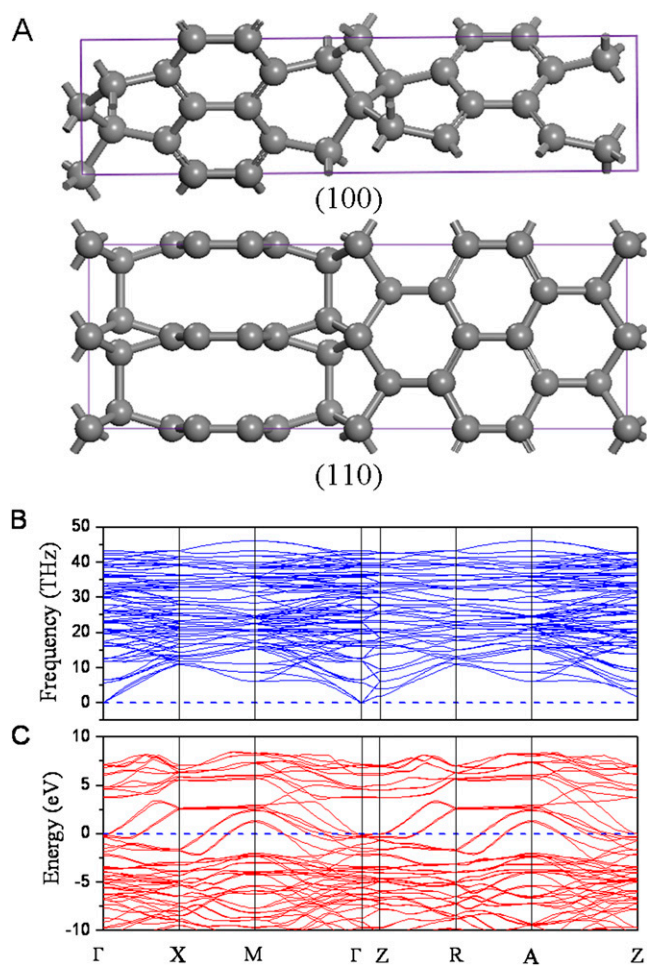

Fig. 53. (A) Optimized geometry of T28-carbon viewed along the [100] and [110] directions, (B) phonon dispersions, and (C) electronic band structure of T28-carbon.

**Table S1. Optimized structural data of the carbon allotropes investigated in this work**

| Structure                                                         | Lattice parameters (Å) |   |       | Atomic Wyckoff positions                                                                                          |
|-------------------------------------------------------------------|------------------------|---|-------|-------------------------------------------------------------------------------------------------------------------|
|                                                                   | a                      | b | c     |                                                                                                                   |
| T6<br><i>P4<sub>2</sub>/mmc</i> (131)                             | 2.60                   |   | 6.00  | C(2f): (1/2, 1/2, 1/4)<br>C(4i): (0, 1/2, 0.1118)                                                                 |
| T14<br><i>P4<sub>2</sub>/mmc</i> (131)                            | 2.56                   |   | 14.62 | C(4h): (1/2, 1/2, 0.9517)<br>C(4i): (1/2, 0, 0.9027)<br>C(4i): (1/2, 0, 0.8084)<br>C(2f): (1/2, 1/2, 1/4)         |
| T12 (1)<br><i>P4<sub>2</sub>/ncm</i> (138)                        | 3.43                   |   | 6.09  | C(8i): (0.3319, 0.8319, 0.3597)<br>C(4b): (0, 0, 0)                                                               |
| T28<br><i>P4<sub>2</sub>/ncm</i> (138)                            | 3.55                   |   | 14.66 | C(8i): (0.2478, 0.2522, 0.6539)<br>C(8i): (0.8385, 0.6615, 0.5559)<br>C(8f): (0, 0, 0.2991)<br>C(4b): (0, 0, 0.5) |
| Cubic-C <sub>16</sub> (2)<br><i>Im<math>\bar{3}</math>m</i> (229) | 4.88                   |   |       | C(16f): (0.3374, 0.3374, 0.3374)                                                                                  |
| T-carbon (3)<br><i>Fd<math>\bar{3}</math>m</i> (227)              | 7.52                   |   |       | C(32e): (0.0706, 0.0706, 0.0706)                                                                                  |
| L-carbon (4)<br><i>P6<sub>3</sub>/mmc</i> (194)                   | 5.32                   |   | 8.68  | C(12k): (0.4274, 0.8548, 0.5267)<br>C(4f): (1/3, 2/3, 0.6681)                                                     |
| Y-carbon (5)<br><i>Fd<math>\bar{3}</math>m</i> (227)              | 9.64                   |   |       | C(8a): (0, 0, 0)<br>C(32e): (0.0888, 0.0888, 0.0888)                                                              |
| TY-carbon (5)<br><i>Fd<math>\bar{3}</math>m</i> (227)             | 13.46                  |   |       | C(32e): (0.0397, 0.0397, 0.0397)<br>C(32e): (0.0987, 0.0987, 0.0987)                                              |

- Zhao Z, et al. (2012) Tetragonal allotrope of group 14 elements. *J Am Chem Soc* 134(30):12362–12365.
- Srinivasu K, Ghosh SK (2012) Electronic structure, optical properties, and hydrogen adsorption characteristics of supercubane-based three-dimensional porous carbon. *J Phys Chem C* 116(47):25015–25021.
- Sheng X-L, Yan Q-B, Ye F, Zheng Q-R, Su G (2011) T-carbon: A novel carbon allotrope. *Phys Rev Lett* 106(15):155703.
- Yang L, He HY, Pan BC (2013) Theoretical prediction of new carbon allotropes. *J Chem Phys* 138(2):024502–024506.
- Jo JY, Kim BG (2012) Carbon allotropes with triple bond predicted by first-principle calculation: Triple bond modified diamond and T-carbon. *Phys Rev B* 86(7):075151.

**Table S2. Calculated equilibrium volume ( $V_0$ ), bulk modulus ( $B_0$ ), and corresponding pressure derivatives ( $B'_0$ )**

| Structure             | $\rho$ (g/cm <sup>3</sup> ) | $B_0$ (GPa)       | $B'_0$ | $V_0$ (Å <sup>3</sup> /atom) |
|-----------------------|-----------------------------|-------------------|--------|------------------------------|
| Diamond               | 3.550                       | 433.1 (1) (454.6) | 3.71   | 5.621                        |
| Lonsdaleite           | 3.487                       | 433.1 (1) (454.5) | 3.63   | 5.719                        |
| graphite              | 2.017                       | 245.0             | 3.51   | 9.890                        |
| T6                    | 2.952                       | 337.4             | 3.79   | 6.766                        |
| T12                   | 3.342                       | 403.2 (1) (424.8) | 3.75   | 5.968                        |
| T14                   | 2.923                       | 349.6             | 3.69   | 6.800                        |
| T28                   | 3.019                       | 356.2             | 3.46   | 6.606                        |
| Cubic-C <sub>16</sub> | 2.750                       | 309.1             | 3.74   | 7.253                        |
| T-carbon              | 1.503                       | 159.8 (2) (169)   | 3.61   | 13.274                       |
| L-carbon              | 1.500                       | 158.1 (3) (159)   | 3.80   | 13.293                       |
| Y-carbon              | 0.891                       | 83.5 (4) (82.9)   | 3.74   | 22.373                       |
| TY-carbon             | 0.523                       | 54.3 (4) (54.2)   | 3.71   | 38.103                       |

The numbers in parentheses are also listed from the given references for comparison.

- Zhao Z, et al. (2012) Tetragonal allotrope of group 14 elements. *J Am Chem Soc* 134(30):12362–12365.
- Sheng X-L, Yan Q-B, Ye F, Zheng Q-R, Su G (2011) T-carbon: A novel carbon allotrope. *Phys Rev Lett* 106(15):155703.
- Yang L, He HY, Pan BC (2013) Theoretical prediction of new carbon allotropes. *J Chem Phys* 138(2):024502–024506.
- Jo JY, Kim BG (2012) Carbon allotropes with triple bond predicted by first-principle calculation: Triple bond modified diamond and T-carbon. *Phys Rev B* 86(7):075151.
